# Supplementary material for: Followers Are Not Enough: A Multifaceted Approach to Community Detection in Online Social Networks
Source: PubMed Central journal article supplement (PMC4534395; doi:10.1371/journal.pone.0134860), 2015-08-12
Supplement: pone.0134860.s001.pdf [file pone.0134860.s001.pdf]

Text S1 – Supporting Information for the Paper  
 “Followers Are Not Enough: A Multifaceted Approach to  
 Community Detection in Online Social Networks”  
 by D. Darmon, E. Omodei, J. Garland

## 1 Transfer entropy and its estimation from data.

Let  $\{X_t\}$  and  $\{Y_t\}$  be two strong-sense stationary stochastic processes. Recall that a stochastic process is strong-sense stationary if the joint distribution for the process evaluated at finitely many time points is invariant to an overall timeshift [3]. In our work, these would correspond to the activities,  $X_t(u)$  and  $X_t(v)$ , of two users  $u$  and  $v$ . We use the notation  $X_{t-k}^t$  to denote the values of the stochastic process from time  $t-k$  to time  $t$ ,  $X_{t-k}^t = (X_{t-k}, X_{t-(k-1)}, \dots, X_{t-1}, X_t)$ . The lag- $k$  transfer entropy [6] of  $Y$  on  $X$  is defined as

$$\text{TE}_{Y \rightarrow X}^{(k)} = H[X_t | X_{t-k}^{t-1}] - H[X_t | X_{t-k}^{t-1}, Y_{t-k}^{t-1}], \quad (1)$$

where

$$H[X_t | X_{t-k}^{t-1}] = -E[\log_2 p(X_t | X_{t-k}^{t-1})] \quad (2)$$

and

$$H[X_t | X_{t-k}^{t-1}, Y_{t-k}^{t-1}] = -E[\log_2 p(X_t | X_{t-k}^{t-1}, Y_{t-k}^{t-1})] \quad (3)$$

are the usual conditional entropies over the conditional (predictive) distributions  $p(x_t | x_{t-k}^{t-1})$  and  $p(x_t | x_{t-k}^{t-1}, y_{t-k}^{t-1})$ . This formulation was originally developed in [6], where transfer entropy was proposed as an information theoretic measure of *directed* information flow. Formally, recalling that  $H[X_t | X_{t-k}^{t-1}]$  is the uncertainty in  $X_t$  given its values at the previous  $k$  time points, and that  $H[X_t | X_{t-k}^{t-1}, Y_{t-k}^{t-1}]$  is the uncertainty in  $X_t$  given the joint process  $\{(X_t, Y_t)\}$  at the previous  $k$  time points, transfer entropy measures the reduction in uncertainty of  $X_t$  by including information about  $Y_{t-k}^{t-1}$ , controlling for the information in  $X_{t-k}^{t-1}$ . By the ‘conditioning reduces entropy’ result [1]

$$H[X|Y, Z] \leq H[X|Y], \quad (4)$$

we can see that transfer entropy is always non-negative, and is zero precisely when

$$H[X_t | X_{t-k}^{t-1}] = H[X_t | X_{t-k}^{t-1}, Y_{t-k}^{t-1}],$$

in which case knowing the past  $k$  lags of  $Y_t$  does not reduce the uncertainty in  $X_t$ . If the transfer entropy is positive, then  $\{Y_t\}$  is considered causal for  $\{X_t\}$  in the Granger sense [2].

When estimating transfer entropy from finite data, we will assume that the process  $\{(X_t, Y_t)\}$  is jointly stationary, which gives us that

$$p(x_t | x_{t-k}^{t-1}) = p(x_{k+1} | x_1^k) \quad (5)$$

and

$$p(x_t|x_{t-k}^{t-1}, y_{t-k}^{t-1}) = p(x_{k+1}|x_1^k, y_1^k) \quad (6)$$

for all  $t$ . That is, the predictive distribution only depends on the past, not on when the past is observed. Given this assumption, we compute estimators for  $p(x_{k+1}|x_1^k)$  and  $p(x_{k+1}|x_1^k, y_1^k)$  by ‘counting’: for each possible marginal and joint past  $x_1^k$  and  $(x_1^k, y_1^k)$ , we count the number of times a future of type  $x_{k+1}$  occurs, and normalize to obtain the appropriate estimators of the one-step-ahead predictive distributions. Call these estimators  $\hat{p}(x_{k+1}|x_1^k)$  and  $\hat{p}(x_{k+1}|x_1^k, y_1^k)$ . Then the plug-in estimator for the transfer entropy is

$$\widehat{\text{TE}}_{Y \rightarrow X}^{(k)} = \hat{H}[X_t|X_{t-k}^{t-1}] - \hat{H}[X_t|X_{t-k}^{t-1}, Y_{t-k}^{t-1}] \quad (7)$$

where we use the plug-in estimators  $\hat{H}[X_t|X_{t-k}^{t-1}]$  and  $\hat{H}[X_t|X_{t-k}^{t-1}, Y_{t-k}^{t-1}]$  for the entropies. It is well known that the plug-in estimator for entropy is biased [5]. To account for this bias, we use the Miller-Madow adjustment to the plug-in estimator [4]. For a random variable  $X$  taking on finitely many values from an alphabet  $\mathcal{X}$ , the Miller-Madow estimator is

$$\tilde{H}[X] = \hat{H}[X] + \frac{|\hat{\mathcal{X}}| - 1}{2n} \quad (8)$$

where  $|\hat{\mathcal{X}}|$  is the number of observed symbols from the alphabet  $\mathcal{X}$  and  $n$  was the number of samples used to estimate  $\hat{H}[X]$ . The definition of transfer entropy (1) can be rewritten in terms of joint entropies as

$$\text{TE}_{Y \rightarrow X}^{(k)} = H[X_t|X_{t-k}^{t-1}] - H[X_t|X_{t-k}^{t-1}, Y_{t-k}^{t-1}] \quad (9)$$

$$= H[X_t, X_{t-k}^{t-1}] - H[X_{t-k}^{t-1}] - H[X_t, X_{t-k}^{t-1}, Y_{t-k}^{t-1}] + H[X_{t-k}^{t-1}, Y_{t-k}^{t-1}], \quad (10)$$

We then apply the Miller-Madow adjustment individually to each of the entropy terms. For example, for the first term, we have

$$\tilde{H}[X_t, X_{t-k}^{t-1}] = \tilde{H}[X_{t-k}^t] = \hat{H}[X_{t-k}^t] + \frac{|\widehat{\mathcal{X}^{k+1}}| - 1}{2n}, \quad (11)$$

where  $|\widehat{\mathcal{X}^{k+1}}|$  is the number of  $(k+1)$ -tuples we actually observe (of the  $2^{k+1}$  possible tuples). Doing this for each term, the overall Miller-Madow estimator for the transfer entropy is

$$\widetilde{\text{TE}}_{Y \rightarrow X}^{(k)} = \tilde{H}[X_t|X_{t-k}^{t-1}] - \tilde{H}[X_t|X_{t-k}^{t-1}, Y_{t-k}^{t-1}] \quad (12)$$

$$= \tilde{H}[X_t, X_{t-k}^{t-1}] - \tilde{H}[X_{t-k}^{t-1}] - \tilde{H}[X_t, X_{t-k}^{t-1}, Y_{t-k}^{t-1}] + \tilde{H}[X_{t-k}^{t-1}, Y_{t-k}^{t-1}]. \quad (13)$$

One possible problem with this estimator is that it can result in *negative* estimates of entropies. That usually occurs when  $\hat{H}$  is very small. In these cases, we set the estimator to zero.

## References

- [1] Thomas M Cover and Joy A Thomas. *Elements of information theory*. Wiley-Interscience, 2006.
- [2] Clive William John Granger. Economic processes involving feedback. *Inform. Control*, 6(1):28–48, 1963.
- [3] Geoffrey Grimmett and David Stirzaker. *Probability and random processes*. Oxford University Press, 2001.
- [4] George A Miller. Note on the bias of information estimates. In H Quastler, editor, *Information theory in psychology II-B*, pages 95–100. Glencoe, Illinois: Free Press, 1955.
- [5] Liam Paninski. Estimation of entropy and mutual information. *Neural Comput.*, 15(6):1191–1253, 2003.
- [6] Thomas Schreiber. Measuring information transfer. *Phys. Rev. Lett.*, 85(2):461–464, 2000.
